# Supplementary material for: Photocatalytic properties of iodometallates with in situ-generated organic bases as countercations
Source: Royal Society of Chemistry journal article supplement (doi:10.1039/d2dt03589h), 2023-01-01
Supplement: d2dt03589h1.pdf [file d2dt03589h1.pdf]

## Supporting Information

**Table S1** Crystal data for Pb<sup>2+</sup> compound

|                                                   |                                                                                                |
|---------------------------------------------------|------------------------------------------------------------------------------------------------|
| Formula                                           | C <sub>18</sub> H <sub>18</sub> N <sub>5</sub> O <sub>2</sub> Pb <sub>1.5</sub> I <sub>6</sub> |
| <i>M</i>                                          | 1408.56                                                                                        |
| <i>T</i> (K)                                      | 298(2)                                                                                         |
| Crystal system                                    | Triclinic                                                                                      |
| Space group                                       | <i>P</i> -1                                                                                    |
| <i>a</i> (Å)                                      | 9.6292(7)                                                                                      |
| <i>b</i> (Å)                                      | 11.1733(9)                                                                                     |
| <i>c</i> (Å)                                      | 16.5314(12) Å                                                                                  |
| $\alpha$ (°)                                      | 80.121(2)                                                                                      |
| $\beta$ (°)                                       | 73.431(2)                                                                                      |
| $\gamma$ (°)                                      | 78.048(2)                                                                                      |
| <i>V</i> (Å <sup>3</sup> )                        | 1655.8(2)                                                                                      |
| <i>Z</i>                                          | 2                                                                                              |
| <i>D<sub>c</sub></i> (g cm <sup>-3</sup> )        | 2.825                                                                                          |
| $\mu$ (mm <sup>-1</sup> )                         | 13.240                                                                                         |
| Reflections collected                             | 19570                                                                                          |
| Unique reflections                                | 6023                                                                                           |
| <i>R</i> <sub>int</sub>                           | 0.2157                                                                                         |
| Gof                                               | 1.179                                                                                          |
| <i>R</i> <sub>1</sub> , <i>I</i> > 2σ( <i>I</i> ) | 0.1173                                                                                         |
| <i>wR</i> <sub>2</sub> , all data                 | 0.3160                                                                                         |

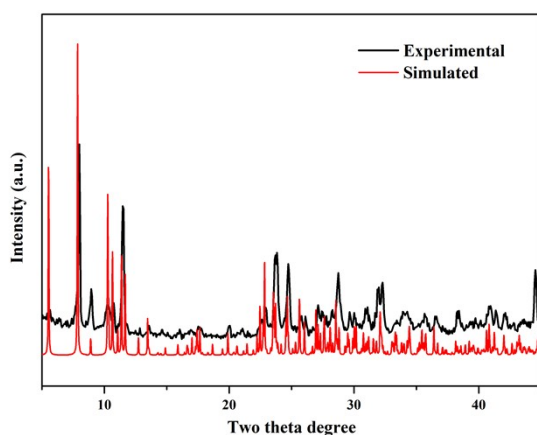

(a)

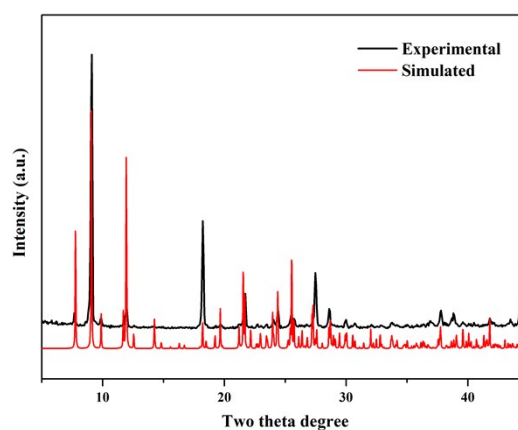

(b)

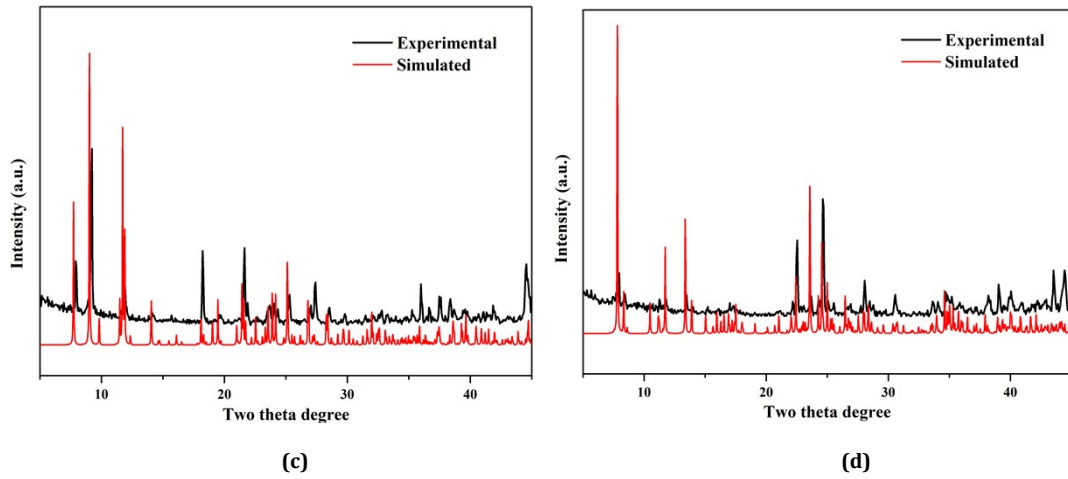

Fig. S1 Experimental and simulated powder XRD patterns for 1-4.

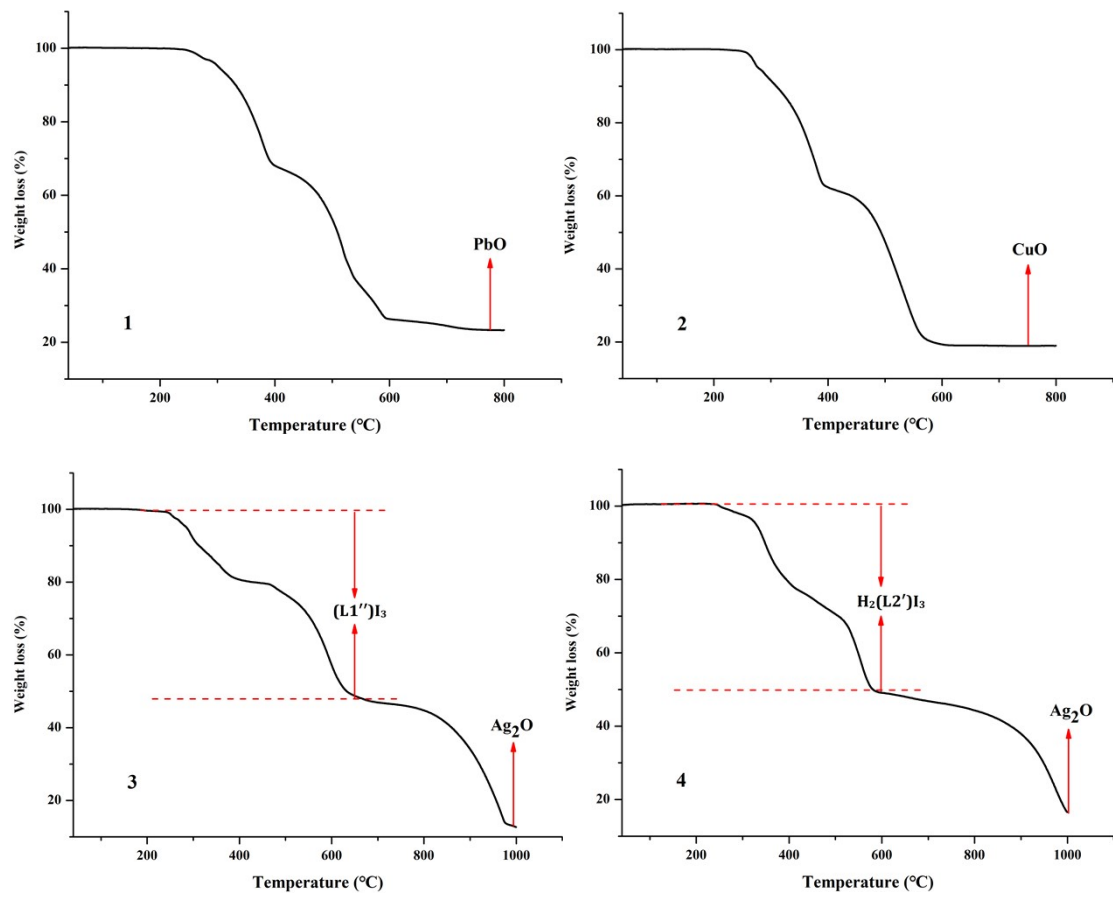

Fig. S2 TG curve of 1-4.

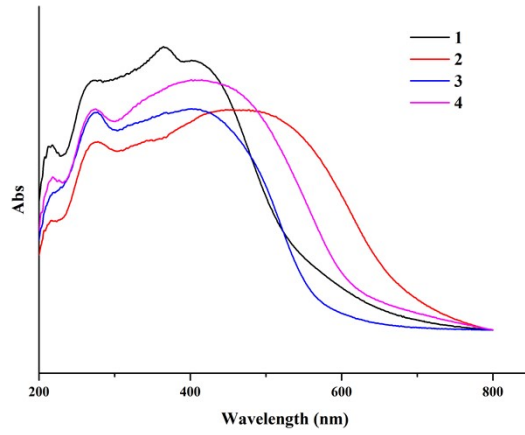

Fig. S3 Solid-state UV-Vis reflectance spectra of 1-4.

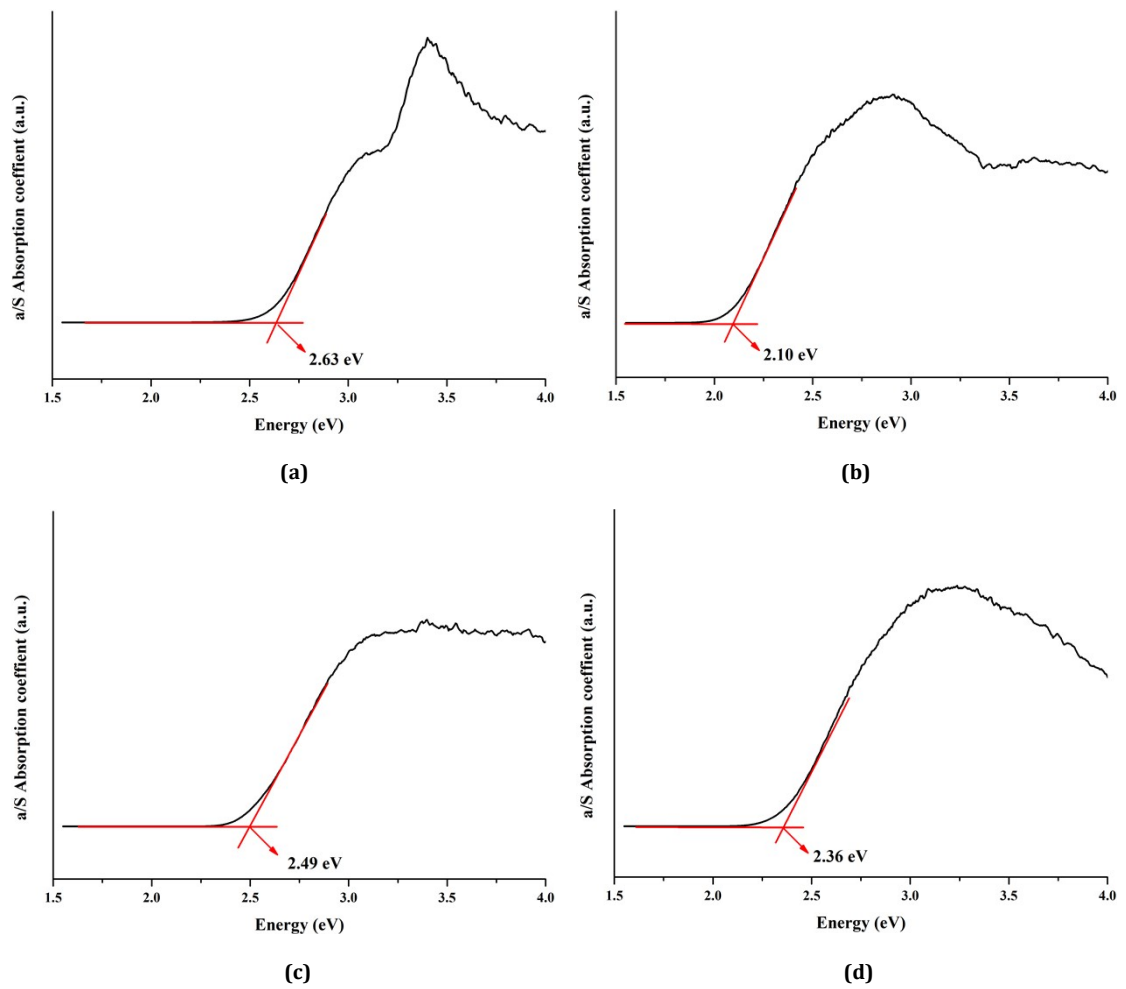

Fig. S4 Solid-state optical absorption spectra of 1-4.

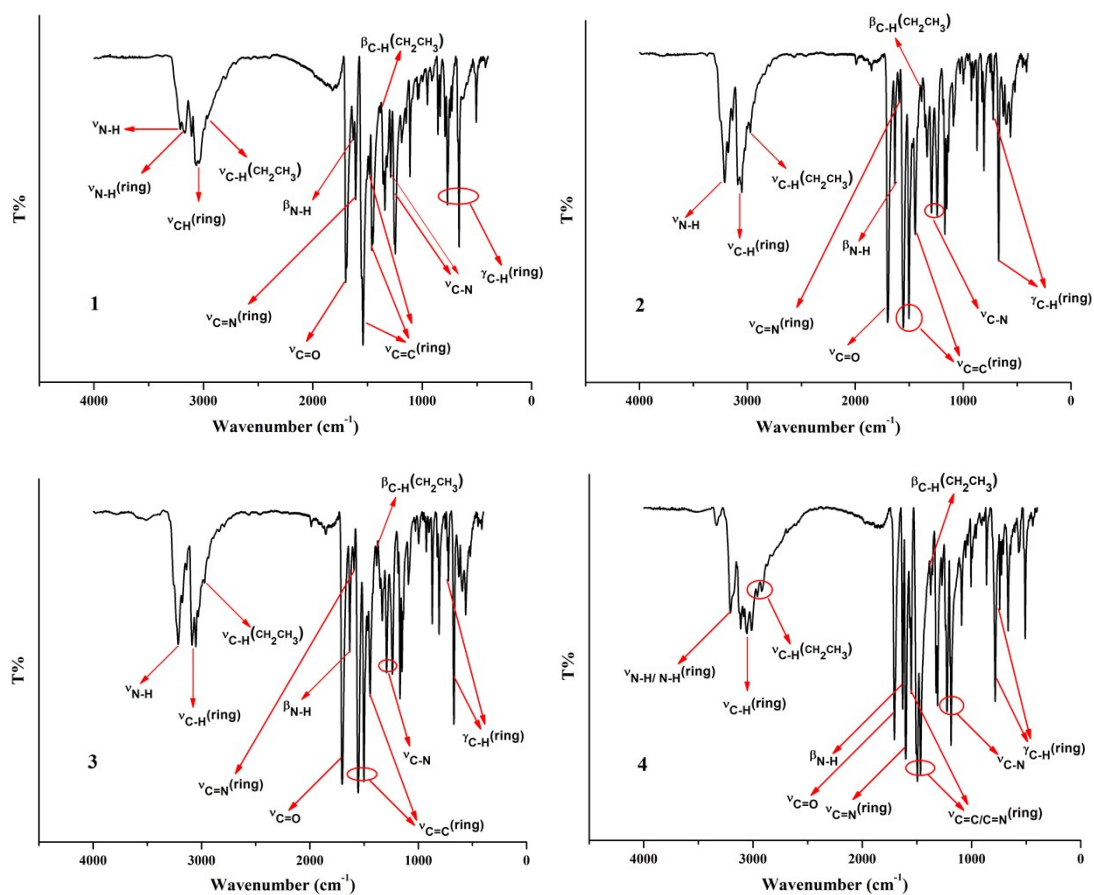

Fig. S5 IR spectra for 1-4.

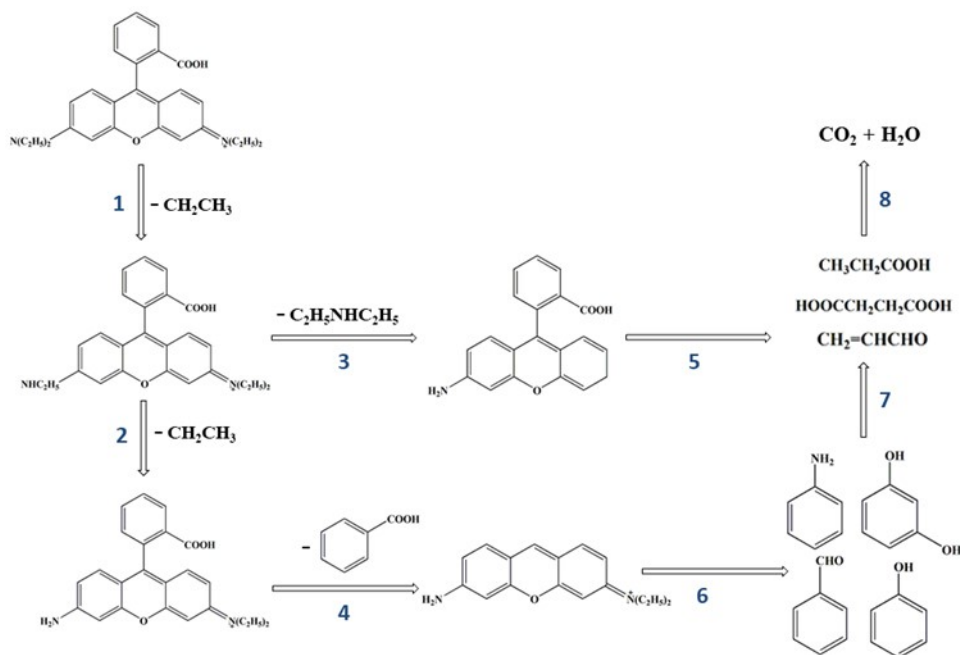

Fig. S6 Photodegradation pathway of RhB.

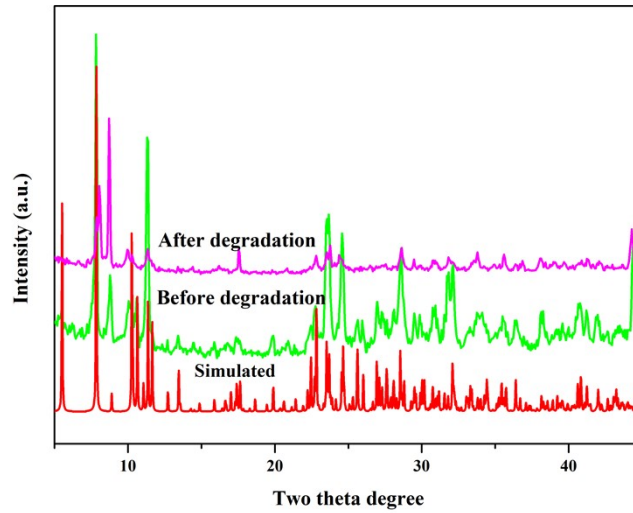

Fig. S7 Powder XRD patterns of **1** before and after degradation.

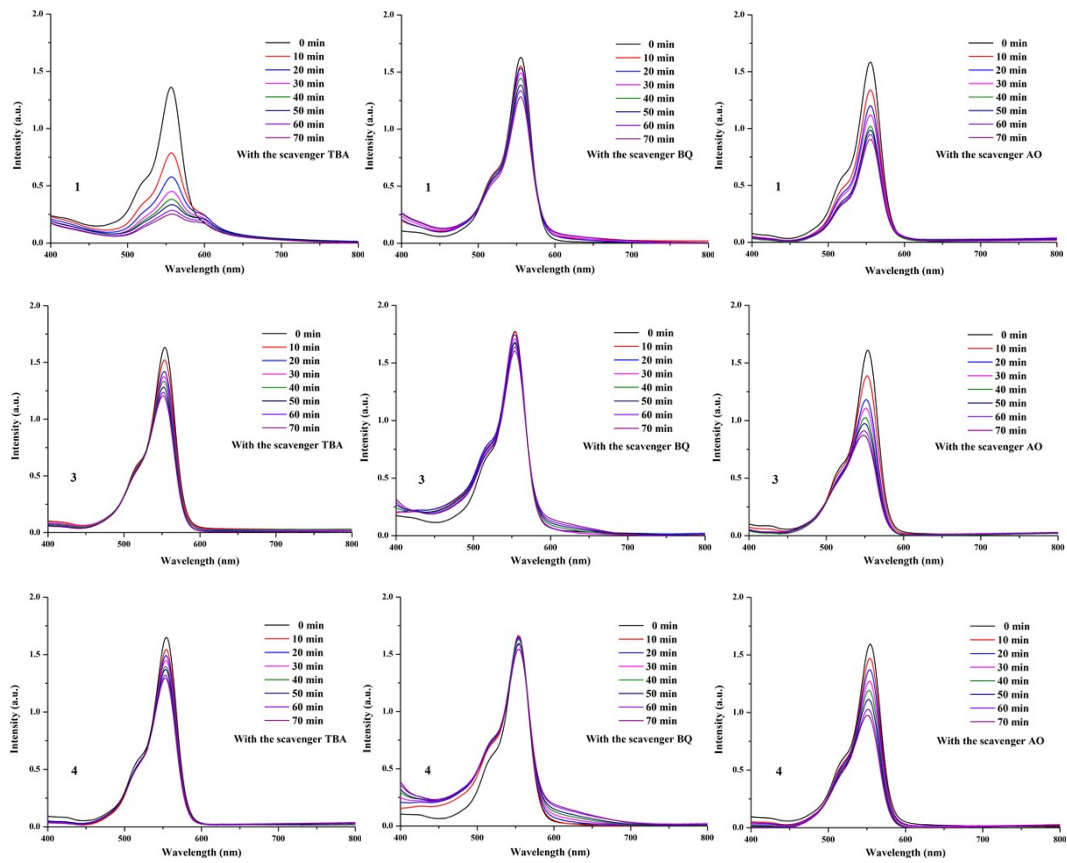

Fig. S8 UV-Vis spectra of **1**, **3** and **4** for active species trapping experiments.

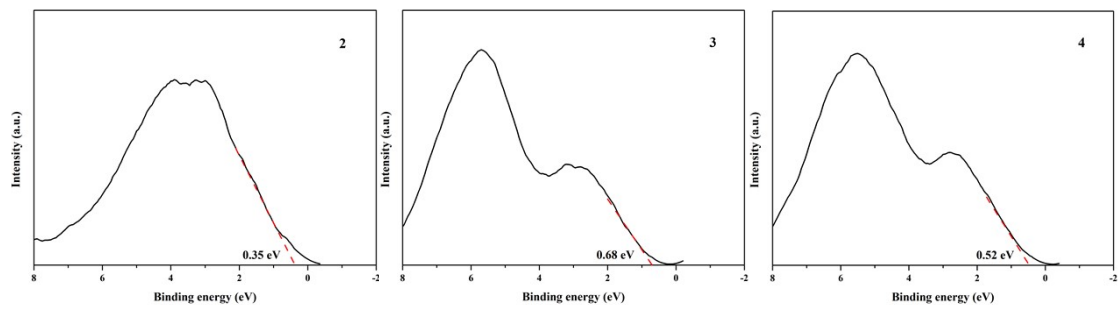

Fig. S9 Estimated XPS HOMO spectra of 2-4.

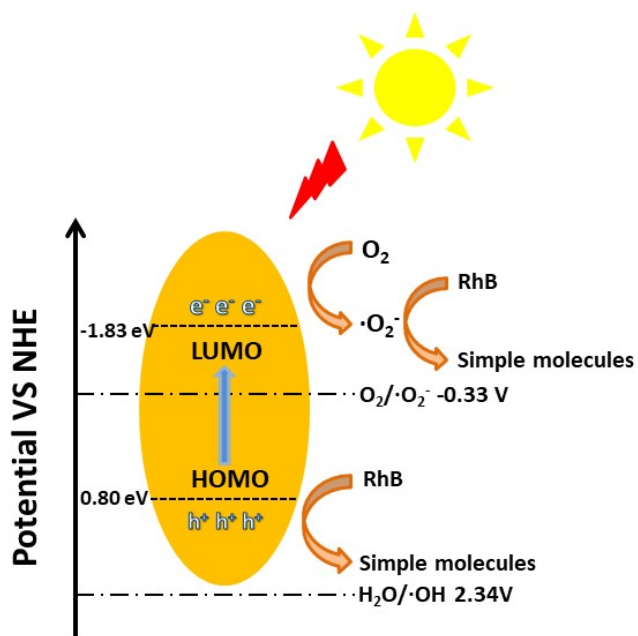

Fig. S10 Photocatalytic mechanism based on XPS for 1.
